# Supplementary material
Source: Springer Nature journal article supplement (https://www.springermedizin.de/resource/supplementary/12943_2009_666_MOESM8_ESM.pdf/9554522)
Supplement: MOESM8 [file 9554522]

CD34+  
 ALL-SIL  
 CCRF-CEM  
 HPB-ALL  
 JURKAT  
 LOUCY  
 MOLT-14  
 MOLT-4  
 PEER  
 SUP-T1  
 YT  
 NK-92

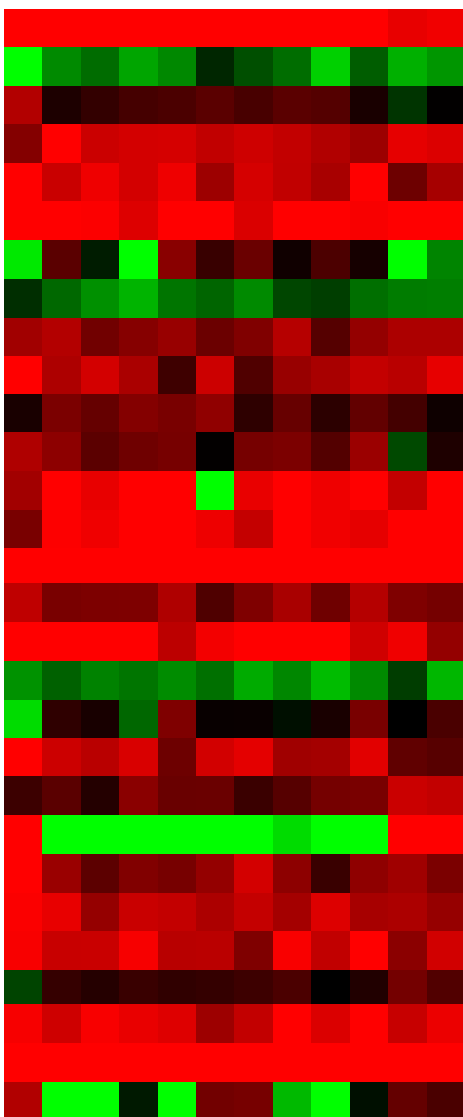

CBX4  
 CBX8  
 PHC1  
 PHC2  
 PHC3  
 BMI1  
 PCGF2  
 RNF2  
 RING1  
 RYBP  
 SCMH1  
 EZH1  
 EZH2  
 EED  
 SUZ12  
 PHF1  
 YY1  
 YY2  
 SFMBT1  
 EPC1  
 E2F6  
 HOP  
 MLL1  
 MLL2  
 MLL3  
 MLL4  
 MLL5  
 SET  
 SETBP1
